# Supplementary material for: A causal relationship between cigarette smoking and type 2 diabetes mellitus: A Mendelian randomization study
Source: PubMed Central journal article supplement (PMC6920406; doi:10.1038/s41598-019-56014-9), 2019-12-18
Supplement: 41598_2019_56014_MOESM1_ESM.pdf [file 41598_2019_56014_MOESM1_ESM.pdf]

## **SUPPLEMENTARY MATERIAL**

### **A causal relationship between cigarette smoking and type 2 diabetes mellitus: A Mendelian randomization study**

**Shuai Yuan<sup>1,2</sup> & Susanna C. Larsson<sup>1,2</sup>**

<sup>1</sup>Unit of Cardiovascular and Nutritional Epidemiology, Institute of Environmental Medicine, Karolinska Institutet, Stockholm, Sweden

<sup>2</sup>Department of Surgical Sciences, Uppsala University, Uppsala, Sweden

**Supplementary Table 1.** Details of studies and datasets used for analyses

| Exposure/ Outcome | Consortium or cohort study                                                                                                                                                                                                                                       | Participants                                                                                 | Web source if publicly available                                                                              |
|-------------------|------------------------------------------------------------------------------------------------------------------------------------------------------------------------------------------------------------------------------------------------------------------|----------------------------------------------------------------------------------------------|---------------------------------------------------------------------------------------------------------------|
| Smoking           | Add Health, ALSPAC, ARIC, BBJ, BEAGESS, BLTS, CADD, CPGEND, COPDGene, deCODE, EGCUT, MERGE, Finntwin & NAG-FIN, FHS, GERA, GfG, HUNT, HRS, MCTFR, MESA, METSIM, NESCOG, NHS, NHS2, HPFS, NINDS SiGN, NTR, OZALC, SardinIA, UK Biobank, WHI                       | 1 232 091 million individuals of European ancestry                                           | <a href="https://conservancy.umn.edu/handle/11299/201564">https://conservancy.umn.edu/handle/11299/201564</a> |
| Type 2 diabetes   | BioMe, deCODE, DGDG, DGI, GCUT_ExomeCore, EGCUT_Human370CNV, EGCUT_OmniExpress, FHS, FUSION, GCKD, GENOA, GERA, G0DARTS, GOMAP-TEENAGE, HPFS, INTERACT_GWAS, KORA, MESA, METSIM, MGI, NHS, NUGENE, PIVUS, PROSPER, RS1, RS2, RS3, UK Biobank, ULSAM, UPCH, WTCCC | 898 130 individuals (74 124 type 2 diabetes cases and 824 006 controls) of European ancestry | <a href="http://diagram-consortium.org/downloads.html">http://diagram-consortium.org/downloads.html</a>       |

Add Health indicates National Longitudinal Study of Adolescent to Adult Health; ALSPAC, Avon Longitudinal Study of Parents and Children; ARIC, Atherosclerosis Risk in Communities; BBJ, BioBank Japan Project; BEAGESS, The Barrett's and Esophageal Adenocarcinoma. Genetic Susceptibility Study; BioME, BioMe™ BioBank Program; BLTS, Brisbane Longitudinal Twin Study; CADD, Center on Antisocial Drug Dependence; COGEND, Collaborative Genetic Study of Nicotine Dependence; COPDGene, Genetics of Chronic Obstructive Pulmonary Disease; deCODE, deCODE Genetics/AMGEN, Inc.; DGDG, Diabetes Gene Discovery Group; DGI, Diabetes Genetics Initiative; EGCUT, Estonian Genome Center; eMERGE, Electronic Medical Records and Genomics; Finntwin & NAG-FIN, Finnish Twin Cohort; FHS, Framingham Heart Study; FUSION, Finland-United States Investigation of NIDDM Genetics; GCKD, German Chronic Kidney Disease Study; GENOA, Genetic Epidemiology Network of Arteriosclerosis; GERA, Genetic Epidemiology Research in Adult Health and Aging; GfG, Genes for Good; GoDARTS, Genetics of Diabetes and Audit Research in Tayside Scotland; GOMAP-TEENAGE, GoMAP (Genetic Overlap between Metabolic and Psychiatric traits) & TEENAGE (TEENs of Attica: Genes and Environment); HUNT, The Nord-Trøndelag Health Study; HPFS, Health Professional Follow-Up Study; HRS, Health and Retirement Study; INTERACT\_coreexome, InterAct Consortium; INTERACT\_GWAS, InterAct Consortium; KORA, KORAGEN Study Helmholtz zentrum München; MCTFR, Minnesota Center for Twin and Family Research; MESA, Multi-Ethnic Study of Atherosclerosis; METSIM, Metabolic Syndrome in Men; MGI, Michigan Genomics Initiative; NESCOG, Netherlands Study on Cognition, Environment and Genes; NHS, NHS2, and HPFS, Nurses' Health Study, Nurses' Health Study II, and Health Professionals' Follow-up Study; NINDS SiGN, The National Institute of Neurological Disorders and Stroke Genetics Network; NTR, Netherlands Twin Register; NUGENE, NUGene Project; OZALC, Australian Twin-Family Studies on Nicotine and Alcohol Genetics; PIVUS, Prospective Investigation of the Vasculature in Uppsala Seniors; PROSPER, PROspective Study of Pravastatin in the Elderly at Risk; RS1, RS2, RS3, Rotterdam Study; SardinIA, SardinIA project; ULSAM, Uppsala Longitudinal Study of Adult Men; UPCH, Danish T2D case-control study; WHI, Women's Health Initiative; WTCCC, Wellcome Trust Case-Control Consortium.

**Supplementary Table 2.** Characteristics of the single-nucleotide polymorphisms associated with smoking initiation and its associations with type 2 diabetes

| SNP         | Chr | Closest Gene              | EA | OA | Smoking initiation |       |       |          | Type 2 diabetes |        |       |       |
|-------------|-----|---------------------------|----|----|--------------------|-------|-------|----------|-----------------|--------|-------|-------|
|             |     |                           |    |    | EAF                | Beta  | SE    | P        | EAF             | Beta   | SE    | P     |
| rs1008078   | 1   | Intergenic                | T  | C  | 0.40               | 0.023 | 0.003 | 1.63E-18 | 0.40            | 0.009  | 0.007 | 0.150 |
| rs1022528   | 1   | Intron:PTGER3             | A  | G  | 0.34               | 0.017 | 0.003 | 8.48E-11 | 0.35            | 0.009  | 0.007 | 0.180 |
| rs10789369  | 1   | Intergenic                | A  | G  | 0.39               | 0.023 | 0.003 | 3.39E-19 | 0.38            | -0.010 | 0.007 | 0.120 |
| rs10873871  | 1   | Intron:ST6GALNAC3         | G  | A  | 0.21               | 0.018 | 0.003 | 2.82E-08 | 0.21            | 0.014  | 0.008 | 0.077 |
| rs10914684  | 1   | Intron:PHC2               | G  | A  | 0.68               | 0.016 | 0.003 | 6.32E-09 | 0.67            | 0.002  | 0.007 | 0.760 |
| rs11162019  | 1   | Intergenic                | C  | T  | 0.64               | 0.016 | 0.003 | 5.06E-09 | 0.64            | 0.001  | 0.007 | 0.880 |
| rs11587399  | 1   | Intergenic                | A  | T  | 0.78               | 0.018 | 0.003 | 7.25E-09 | 0.78            | 0.029  | 0.008 | 0.000 |
| rs12022778  | 1   | Intron:ELAVL4             | C  | A  | 0.20               | 0.027 | 0.003 | 3.18E-17 | 0.20            | -0.004 | 0.008 | 0.600 |
| rs12027999  | 1   | Intron:UBAP2L             | T  | C  | 0.88               | 0.024 | 0.004 | 5.33E-10 | 0.87            | -0.023 | 0.010 | 0.016 |
| rs12130857  | 1   | Intron:CAMTA1             | G  | A  | 0.68               | 0.018 | 0.003 | 3.65E-11 | 0.68            | 0.007  | 0.007 | 0.310 |
| rs12563365  | 1   | Intron:ACTN2              | A  | G  | 0.56               | 0.017 | 0.003 | 1.05E-10 | 0.55            | 0.010  | 0.006 | 0.110 |
| rs12739243  | 1   | Intron:SYT14              | T  | C  | 0.78               | 0.021 | 0.003 | 4.45E-12 | 0.77            | 0.021  | 0.008 | 0.005 |
| rs12740789  | 1   | Intergenic                | G  | A  | 0.82               | 0.029 | 0.003 | 1.18E-17 | 0.81            | 0.040  | 0.008 | 0.000 |
| rs12755632  | 1   | Intergenic                | A  | G  | 0.68               | 0.015 | 0.003 | 1.93E-08 | 0.68            | 0.014  | 0.007 | 0.047 |
| rs147052174 | 1   | Nonsynonymous:FAM163A     | T  | G  | 0.02               | 0.062 | 0.010 | 2.30E-10 | 0.02            | 0.083  | 0.026 | 0.001 |
| rs1514176   | 1   | Intron:FPGT-TNNI3K TNNI3K | G  | A  | 0.42               | 0.019 | 0.003 | 7.67E-14 | 0.43            | -0.003 | 0.006 | 0.640 |
| rs1889571   | 1   | Intron:ADGRB2             | G  | T  | 0.13               | 0.022 | 0.004 | 4.19E-09 | 0.13            | 0.019  | 0.010 | 0.049 |
| rs1935571   | 1   | Intergenic                | T  | G  | 0.52               | 0.016 | 0.003 | 6.99E-10 | 0.52            | 0.015  | 0.006 | 0.021 |
| rs1937443   | 1   | Intron:PDE4B              | G  | C  | 0.56               | 0.020 | 0.003 | 1.79E-15 | 0.57            | 0.007  | 0.007 | 0.330 |
| rs2637869   | 1   | Intergenic                | A  | G  | 0.30               | 0.018 | 0.003 | 6.54E-11 | 0.30            | -0.013 | 0.007 | 0.070 |
| rs2901785   | 1   | Intron:LOC102724601       | G  | A  | 0.55               | 0.017 | 0.003 | 1.47E-11 | 0.57            | -0.001 | 0.006 | 0.940 |
| rs301807    | 1   | Intron:LOC102724552 RERE  | G  | A  | 0.57               | 0.018 | 0.003 | 2.50E-12 | 0.58            | -0.002 | 0.006 | 0.740 |
| rs35656245  | 1   | Intergenic                | A  | G  | 0.28               | 0.016 | 0.003 | 2.23E-08 | 0.27            | -0.013 | 0.007 | 0.080 |
| rs3820277   | 1   | Intron:IGSF21             | G  | T  | 0.47               | 0.019 | 0.003 | 1.57E-13 | 0.47            | 0.003  | 0.006 | 0.650 |

|             |   |                         |   |   |      |       |       |          |      |        |       |       |
|-------------|---|-------------------------|---|---|------|-------|-------|----------|------|--------|-------|-------|
| rs45444697  | 1 | Intron:ADAM15 DCST1-AS1 | G | C | 0.21 | 0.020 | 0.003 | 2.72E-10 | 0.22 | 0.009  | 0.008 | 0.270 |
| rs4912332   | 1 | Intergenic              | T | C | 0.49 | 0.014 | 0.003 | 2.94E-08 | 0.49 | 0.012  | 0.006 | 0.067 |
| rs80054503  | 1 | Intergenic              | T | C | 0.88 | 0.024 | 0.004 | 3.10E-09 | 0.99 | 0.045  | 0.055 | 0.410 |
| rs876793    | 1 | Intron:RYR2             | T | C | 0.65 | 0.018 | 0.003 | 5.69E-11 | 0.65 | 0.008  | 0.007 | 0.220 |
| rs925524    | 1 | Synonymous:MAST2        | G | A | 0.71 | 0.016 | 0.003 | 2.94E-08 | 0.72 | 0.025  | 0.007 | 0.001 |
| rs951740    | 1 | Intron:PTPRF            | A | G | 0.63 | 0.030 | 0.003 | 3.82E-29 | 0.62 | 0.005  | 0.007 | 0.440 |
| rs1004787   | 2 | Intron:LINC01833        | A | G | 0.55 | 0.028 | 0.003 | 1.11E-28 | 0.55 | -0.012 | 0.006 | 0.065 |
| rs1022376   | 2 | Intergenic              | T | C | 0.48 | 0.015 | 0.003 | 1.66E-08 | 0.48 | 0.009  | 0.006 | 0.160 |
| rs10490159  | 2 | Intron:LOC730100        | T | C | 0.39 | 0.017 | 0.003 | 3.86E-11 | 0.40 | -0.003 | 0.007 | 0.670 |
| rs114976176 | 2 | Intron:SH3YL1           | A | C | 0.65 | 0.016 | 0.003 | 6.04E-09 | 0.65 | 0.013  | 0.007 | 0.044 |
| rs11678980  | 2 | Exon:LINC01806          | A | G | 0.45 | 0.018 | 0.003 | 5.19E-12 | 0.45 | 0.017  | 0.007 | 0.008 |
| rs11692435  | 2 | Nonsynonymous:ACTR1B    | A | G | 0.08 | 0.025 | 0.005 | 4.47E-08 | 0.10 | 0.003  | 0.012 | 0.780 |
| rs11889814  | 2 | Intergenic              | A | C | 0.87 | 0.021 | 0.004 | 3.44E-08 | 0.87 | 0.011  | 0.009 | 0.260 |
| rs12474587  | 2 | Intron:SLC4A10          | T | G | 0.43 | 0.024 | 0.003 | 4.83E-21 | 0.43 | -0.015 | 0.006 | 0.022 |
| rs12714017  | 2 | Intergenic              | C | T | 0.51 | 0.015 | 0.003 | 3.65E-09 | 0.51 | 0.007  | 0.006 | 0.240 |
| rs13007361  | 2 | Intergenic              | A | G | 0.21 | 0.018 | 0.003 | 2.29E-08 | 0.20 | 0.001  | 0.008 | 0.870 |
| rs13392222  | 2 | Intron:AFF3             | A | C | 0.86 | 0.023 | 0.004 | 1.93E-10 | 0.86 | -0.002 | 0.009 | 0.820 |
| rs1445649   | 2 | Intron:KCNJ3            | C | T | 0.54 | 0.021 | 0.003 | 8.48E-16 | 0.53 | -0.009 | 0.006 | 0.170 |
| rs1518393   | 2 | Intron:VRK2             | C | A | 0.62 | 0.017 | 0.003 | 1.30E-10 | 0.62 | 0.006  | 0.007 | 0.370 |
| rs16826827  | 2 | Intergenic              | T | C | 0.88 | 0.022 | 0.004 | 9.17E-09 | 0.88 | -0.010 | 0.010 | 0.290 |
| rs1722666   | 2 | Intergenic              | T | C | 0.73 | 0.016 | 0.003 | 2.17E-08 | 0.73 | -0.011 | 0.007 | 0.110 |
| rs17229285  | 2 | Intergenic              | C | T | 0.50 | 0.016 | 0.003 | 1.27E-09 | 0.50 | 0.000  | 0.006 | 0.990 |
| rs17616642  | 2 | Intron:LINC01122        | A | G | 0.75 | 0.017 | 0.003 | 2.10E-08 | 0.75 | -0.011 | 0.007 | 0.150 |
| rs1863161   | 2 | Intergenic              | A | G | 0.56 | 0.015 | 0.003 | 2.34E-09 | 0.57 | 0.004  | 0.006 | 0.520 |
| rs1901477   | 2 | Intergenic              | G | A | 0.51 | 0.030 | 0.003 | 2.07E-31 | 0.51 | 0.026  | 0.007 | 0.000 |
| rs2539706   | 2 | Intergenic              | A | G | 0.53 | 0.016 | 0.003 | 1.95E-10 | 0.52 | 0.007  | 0.006 | 0.280 |
| rs2710634   | 2 | Intron:BIRC6            | T | C | 0.48 | 0.018 | 0.003 | 3.36E-12 | 0.48 | 0.010  | 0.006 | 0.120 |
| rs3076896   | 2 | Intergenic              | A | G | 0.39 | 0.023 | 0.003 | 1.99E-16 | 0.00 | 0.100  | 0.074 | 0.180 |
| rs3115418   | 2 | Intergenic              | T | C | 0.55 | 0.014 | 0.003 | 2.79E-08 | 0.55 | 0.014  | 0.006 | 0.031 |

|            |   |                     |   |   |      |       |       |          |      |        |       |       |
|------------|---|---------------------|---|---|------|-------|-------|----------|------|--------|-------|-------|
| rs34399632 | 2 | Intron:THSD7B       | G | A | 0.23 | 0.019 | 0.003 | 1.46E-10 | 0.25 | 0.005  | 0.007 | 0.490 |
| rs357304   | 2 | Intergenic          | C | T | 0.73 | 0.017 | 0.003 | 5.40E-09 | 0.73 | 0.001  | 0.007 | 0.930 |
| rs359247   | 2 | Intergenic          | T | A | 0.64 | 0.022 | 0.003 | 9.89E-17 | 0.64 | 0.014  | 0.007 | 0.031 |
| rs3811038  | 2 | Intron:TTL          | C | T | 0.28 | 0.019 | 0.003 | 1.58E-11 | 0.29 | 0.014  | 0.007 | 0.052 |
| rs4674916  | 2 | Intron:CUL3         | C | A | 0.67 | 0.018 | 0.003 | 3.06E-11 | 0.68 | 0.003  | 0.007 | 0.660 |
| rs4674993  | 2 | Intron:NYAP2        | A | G | 0.80 | 0.024 | 0.003 | 4.85E-14 | 0.80 | -0.014 | 0.008 | 0.074 |
| rs56208390 | 2 | Intergenic          | G | A | 0.12 | 0.022 | 0.004 | 2.68E-08 | 0.12 | 0.014  | 0.010 | 0.140 |
| rs61533748 | 2 | Intergenic          | C | T | 0.38 | 0.017 | 0.003 | 2.82E-11 | 0.39 | 0.027  | 0.007 | 0.000 |
| rs62106258 | 2 | Intergenic          | T | C | 0.95 | 0.046 | 0.006 | 3.33E-14 | 0.95 | 0.110  | 0.016 | 0.000 |
| rs62137126 | 2 | Intergenic          | A | G | 0.88 | 0.024 | 0.004 | 1.31E-09 | 0.88 | -0.021 | 0.010 | 0.031 |
| rs62180324 | 2 | Intron:WDPCP        | G | A | 0.79 | 0.020 | 0.003 | 3.91E-10 | 0.79 | -0.001 | 0.008 | 0.900 |
| rs62193862 | 2 | Intergenic          | A | G | 0.10 | 0.024 | 0.004 | 1.99E-08 | 0.10 | -0.004 | 0.011 | 0.690 |
| rs6730325  | 2 | Intergenic          | G | A | 0.39 | 0.015 | 0.003 | 2.10E-08 | 0.39 | 0.036  | 0.007 | 0.000 |
| rs6731872  | 2 | Intergenic          | G | T | 0.83 | 0.032 | 0.003 | 5.35E-21 | 0.83 | 0.053  | 0.009 | 0.000 |
| rs6750107  | 2 | Intron:CTNNA2       | A | G | 0.39 | 0.015 | 0.003 | 2.60E-08 | 0.40 | -0.019 | 0.007 | 0.003 |
| rs6750529  | 2 | Intron:LINC01934    | T | C | 0.74 | 0.020 | 0.003 | 9.26E-12 | 0.74 | 0.004  | 0.007 | 0.620 |
| rs6756212  | 2 | Intergenic          | C | T | 0.46 | 0.034 | 0.003 | 3.49E-40 | 0.47 | -0.011 | 0.006 | 0.077 |
| rs72790288 | 2 | Intron:ALK          | G | A | 0.97 | 0.046 | 0.008 | 3.28E-09 | 0.97 | -0.010 | 0.019 | 0.600 |
| rs74697736 | 2 | Intergenic          | A | G | 0.29 | 0.022 | 0.003 | 2.43E-15 | 0.29 | -0.003 | 0.007 | 0.700 |
| rs75210106 | 2 | Intron:TTL          | C | T | 0.82 | 0.019 | 0.003 | 2.33E-08 | 0.82 | 0.012  | 0.008 | 0.160 |
| rs7585579  | 2 | Intergenic          | G | C | 0.50 | 0.020 | 0.003 | 5.48E-15 | 0.50 | 0.006  | 0.007 | 0.400 |
| rs7598402  | 2 | Intron:NRXN1        | C | G | 0.51 | 0.015 | 0.003 | 7.38E-09 | 0.51 | -0.002 | 0.006 | 0.800 |
| rs7600835  | 2 | Intergenic          | G | A | 0.66 | 0.015 | 0.003 | 1.80E-08 | 0.65 | 0.005  | 0.007 | 0.500 |
| rs10446419 | 3 | Intergenic          | A | G | 0.79 | 0.020 | 0.003 | 5.05E-10 | 0.79 | 0.011  | 0.008 | 0.160 |
| rs10935779 | 3 | Intron:RNF13        | C | T | 0.58 | 0.014 | 0.003 | 2.95E-08 | 0.58 | 0.012  | 0.006 | 0.065 |
| rs11128203 | 3 | Intron:FOXP1        | A | T | 0.53 | 0.020 | 0.003 | 1.29E-15 | 0.53 | 0.001  | 0.006 | 0.840 |
| rs11713899 | 3 | Intron:CNTN4        | C | A | 0.17 | 0.019 | 0.003 | 3.15E-08 | 0.17 | 0.006  | 0.009 | 0.510 |
| rs1187820  | 3 | Intergenic          | C | T | 0.56 | 0.014 | 0.003 | 2.69E-08 | 0.56 | 0.020  | 0.007 | 0.003 |
| rs12053870 | 3 | Intron:LOC105374060 | G | T | 0.54 | 0.016 | 0.003 | 1.02E-09 | 0.54 | 0.005  | 0.006 | 0.420 |

|            |   |                               |   |   |      |       |       |          |      |        |       |       |
|------------|---|-------------------------------|---|---|------|-------|-------|----------|------|--------|-------|-------|
| rs12633090 | 3 | Intergenic                    | G | C | 0.82 | 0.023 | 0.003 | 3.16E-12 | 0.82 | 0.006  | 0.008 | 0.450 |
| rs13066050 | 3 | Intergenic                    | T | C | 0.21 | 0.019 | 0.003 | 1.93E-09 | 0.21 | 0.004  | 0.008 | 0.630 |
| rs13319205 | 3 | Intron:SMARCC1                | A | T | 0.29 | 0.017 | 0.003 | 3.77E-09 | 0.29 | -0.020 | 0.007 | 0.005 |
| rs1449012  | 3 | Intron:IQCJ-SCHIP1 SCHIP1     | C | T | 0.54 | 0.015 | 0.003 | 1.77E-09 | 0.53 | -0.003 | 0.006 | 0.700 |
| rs1549979  | 3 | Intron:CADM2                  | C | T | 0.39 | 0.025 | 0.003 | 8.80E-21 | 0.38 | 0.001  | 0.007 | 0.900 |
| rs16828799 | 3 | Intron:NLGN1                  | T | G | 0.16 | 0.020 | 0.004 | 1.83E-08 | 0.16 | -0.013 | 0.009 | 0.130 |
| rs1714521  | 3 | Intron:LOC100996447           | A | C | 0.59 | 0.016 | 0.003 | 3.07E-10 | 0.58 | -0.016 | 0.006 | 0.012 |
| rs1910236  | 3 | Intergenic                    | A | G | 0.47 | 0.015 | 0.003 | 9.91E-09 | 0.47 | -0.005 | 0.006 | 0.460 |
| rs2196356  | 3 | Intergenic                    | G | C | 0.71 | 0.019 | 0.003 | 2.45E-11 | 0.71 | 0.007  | 0.007 | 0.340 |
| rs221988   | 3 | Intergenic                    | A | C | 0.62 | 0.015 | 0.003 | 1.43E-08 | 0.61 | 0.003  | 0.007 | 0.610 |
| rs2276825  | 3 | Intron:STIMATE TMEM110-MUSTN1 | C | T | 0.25 | 0.019 | 0.003 | 1.89E-10 | 0.25 | 0.024  | 0.007 | 0.001 |
| rs2279829  | 3 | Utr3:ZIC4                     | C | T | 0.78 | 0.017 | 0.003 | 2.05E-08 | 0.78 | -0.013 | 0.008 | 0.084 |
| rs2306866  | 3 | Intron:CACNA1D                | A | T | 0.39 | 0.017 | 0.003 | 1.89E-10 | 0.38 | -0.002 | 0.007 | 0.750 |
| rs2319545  | 3 | Intergenic                    | A | C | 0.15 | 0.023 | 0.004 | 8.30E-11 | 0.15 | -0.003 | 0.009 | 0.740 |
| rs2526390  | 3 | Intron:SEMA3F SEMA3F-AS1      | T | C | 0.33 | 0.021 | 0.003 | 3.62E-14 | 0.33 | 0.010  | 0.007 | 0.160 |
| rs2734390  | 3 | Intron:FHIT                   | G | A | 0.37 | 0.015 | 0.003 | 2.09E-08 | 0.37 | 0.010  | 0.007 | 0.150 |
| rs3172494  | 3 | Utr3:IP6K2                    | G | T | 0.89 | 0.029 | 0.004 | 3.40E-13 | 0.88 | 0.013  | 0.010 | 0.220 |
| rs4543050  | 3 | Intergenic                    | T | A | 0.82 | 0.022 | 0.003 | 1.45E-11 | 0.82 | 0.015  | 0.008 | 0.064 |
| rs57153235 | 3 | Intron:CADM2                  | T | G | 0.68 | 0.019 | 0.003 | 1.56E-12 | 0.68 | 0.015  | 0.007 | 0.024 |
| rs62246017 | 3 | Intron:FOXP1                  | G | A | 0.68 | 0.016 | 0.003 | 3.03E-09 | 0.68 | 0.013  | 0.007 | 0.070 |
| rs6437769  | 3 | Intergenic                    | T | C | 0.58 | 0.014 | 0.003 | 3.74E-08 | 0.58 | 0.013  | 0.007 | 0.039 |
| rs6438436  | 3 | Intergenic                    | T | C | 0.82 | 0.025 | 0.003 | 5.33E-14 | 0.81 | 0.012  | 0.008 | 0.150 |
| rs6782116  | 3 | Intron:ROBO2                  | C | T | 0.58 | 0.015 | 0.003 | 1.46E-08 | 0.58 | -0.013 | 0.007 | 0.054 |
| rs73831818 | 3 | Intron:ERC2                   | G | A | 0.06 | 0.032 | 0.006 | 5.46E-09 | 0.06 | 0.026  | 0.014 | 0.056 |
| rs74664784 | 3 | Intron:CADM2                  | T | C | 0.62 | 0.020 | 0.003 | 9.34E-13 | 1.00 | 0.120  | 0.190 | 0.520 |
| rs748832   | 3 | Intergenic                    | G | A | 0.37 | 0.017 | 0.003 | 6.60E-11 | 0.37 | 0.012  | 0.007 | 0.081 |
| rs7631379  | 3 | Intron:SOX2-OT                | C | T | 0.21 | 0.021 | 0.003 | 3.94E-11 | 0.20 | 0.015  | 0.008 | 0.061 |
| rs7640107  | 3 | Intron:FHIT                   | C | T | 0.57 | 0.014 | 0.003 | 3.46E-08 | 0.57 | -0.002 | 0.006 | 0.720 |

|             |   |                  |   |   |      |       |       |          |      |        |       |       |
|-------------|---|------------------|---|---|------|-------|-------|----------|------|--------|-------|-------|
| rs9288999   | 3 | Intron:ZBTB20    | A | G | 0.74 | 0.017 | 0.003 | 1.50E-09 | 0.73 | 0.000  | 0.007 | 1.000 |
| rs963354    | 3 | Intergenic       | A | C | 0.69 | 0.015 | 0.003 | 4.21E-08 | 0.68 | -0.013 | 0.007 | 0.061 |
| rs9826984   | 3 | Intergenic       | G | A | 0.46 | 0.014 | 0.003 | 3.87E-08 | 0.46 | -0.005 | 0.006 | 0.460 |
| rs9841807   | 3 | Intergenic       | T | C | 0.27 | 0.016 | 0.003 | 1.35E-08 | 0.28 | 0.002  | 0.007 | 0.780 |
| rs9850597   | 3 | Intergenic       | G | A | 0.18 | 0.019 | 0.003 | 1.65E-08 | 0.18 | 0.004  | 0.008 | 0.590 |
| rs1116690   | 4 | Intron:INPP4B    | G | A | 0.74 | 0.016 | 0.003 | 2.16E-08 | 0.75 | -0.025 | 0.007 | 0.001 |
| rs112725451 | 4 | Intergenic       | T | C | 0.17 | 0.026 | 0.003 | 1.65E-14 | 0.17 | 0.012  | 0.009 | 0.160 |
| rs1160685   | 4 | Intron:GRID2     | G | C | 0.45 | 0.015 | 0.003 | 2.31E-09 | 0.44 | -0.003 | 0.006 | 0.690 |
| rs12642744  | 4 | Intergenic       | G | T | 0.26 | 0.017 | 0.003 | 2.82E-08 | 0.25 | 0.013  | 0.008 | 0.090 |
| rs13109980  | 4 | Intron:MAML3     | G | A | 0.67 | 0.022 | 0.003 | 3.37E-16 | 0.67 | 0.031  | 0.007 | 0.000 |
| rs13110073  | 4 | Intron:TTC29     | T | C | 0.61 | 0.025 | 0.003 | 3.24E-21 | 0.60 | -0.003 | 0.007 | 0.660 |
| rs1389171   | 4 | Intergenic       | T | A | 0.76 | 0.018 | 0.003 | 4.45E-09 | 0.76 | 0.019  | 0.007 | 0.009 |
| rs1435479   | 4 | Intron:GRID2     | T | G | 0.29 | 0.016 | 0.003 | 5.68E-09 | 0.29 | 0.023  | 0.007 | 0.001 |
| rs28717373  | 4 | Intergenic       | C | T | 0.64 | 0.017 | 0.003 | 6.16E-10 | 0.63 | -0.004 | 0.007 | 0.570 |
| rs3934797   | 4 | Intergenic       | G | A | 0.82 | 0.021 | 0.003 | 1.12E-10 | 0.82 | -0.002 | 0.008 | 0.810 |
| rs4140932   | 4 | Intergenic       | T | A | 0.57 | 0.014 | 0.003 | 4.89E-08 | 0.57 | 0.004  | 0.006 | 0.590 |
| rs55900829  | 4 | Intergenic       | T | A | 0.33 | 0.019 | 0.003 | 5.63E-12 | 0.44 | 0.021  | 0.018 | 0.240 |
| rs55944129  | 4 | Intergenic       | T | C | 0.73 | 0.018 | 0.003 | 1.06E-09 | 0.72 | 0.006  | 0.007 | 0.410 |
| rs58400863  | 4 | Intron:LINC02497 | G | A | 0.65 | 0.020 | 0.003 | 4.89E-14 | 0.65 | -0.002 | 0.007 | 0.790 |
| rs59537158  | 4 | Intergenic       | T | C | 0.21 | 0.023 | 0.003 | 4.62E-13 | 0.21 | 0.007  | 0.008 | 0.390 |
| rs62340589  | 4 | Intron:GPM6A     | C | G | 0.20 | 0.017 | 0.003 | 4.31E-08 | 0.21 | 0.001  | 0.008 | 0.910 |
| rs71602617  | 4 | Intergenic       | C | T | 0.78 | 0.018 | 0.003 | 2.10E-08 | 0.78 | -0.006 | 0.008 | 0.420 |
| rs7657022   | 4 | Intergenic       | G | A | 0.49 | 0.018 | 0.003 | 7.34E-13 | 0.49 | 0.007  | 0.006 | 0.310 |
| rs7696257   | 4 | Intergenic       | A | G | 0.37 | 0.015 | 0.003 | 6.78E-09 | 0.37 | 0.000  | 0.007 | 0.960 |
| rs10042827  | 5 | Intron:RANBP17   | C | T | 0.68 | 0.017 | 0.003 | 9.41E-10 | 0.68 | 0.013  | 0.007 | 0.054 |
| rs10060196  | 5 | Intergenic       | A | C | 0.58 | 0.018 | 0.003 | 1.29E-12 | 0.58 | -0.006 | 0.006 | 0.320 |
| rs10805858  | 5 | Intergenic       | T | A | 0.34 | 0.018 | 0.003 | 1.88E-11 | 0.34 | 0.016  | 0.007 | 0.018 |
| rs1173461   | 5 | Intergenic       | T | C | 0.33 | 0.017 | 0.003 | 9.51E-10 | 0.33 | 0.001  | 0.007 | 0.920 |
| rs11956866  | 5 | Intergenic       | T | G | 0.43 | 0.015 | 0.003 | 7.82E-09 | 0.43 | -0.006 | 0.006 | 0.360 |

|             |   |                     |   |   |      |       |       |          |      |        |       |       |
|-------------|---|---------------------|---|---|------|-------|-------|----------|------|--------|-------|-------|
| rs12517438  | 5 | Intergenic          | G | T | 0.54 | 0.015 | 0.003 | 1.89E-09 | 0.54 | -0.003 | 0.006 | 0.640 |
| rs1385108   | 5 | Intergenic          | T | C | 0.24 | 0.019 | 0.003 | 3.84E-10 | 0.24 | -0.003 | 0.007 | 0.700 |
| rs17165769  | 5 | Intron:FBXL17       | G | A | 0.39 | 0.016 | 0.003 | 9.56E-10 | 0.39 | 0.004  | 0.006 | 0.520 |
| rs181508347 | 5 | Intergenic          | G | T | 0.01 | 0.081 | 0.013 | 4.95E-10 | 0.01 | 0.020  | 0.033 | 0.550 |
| rs2028269   | 5 | Intron:THBS4        | A | G | 0.40 | 0.016 | 0.003 | 5.19E-10 | 0.40 | 0.016  | 0.006 | 0.014 |
| rs2173019   | 5 | Intron:TENM2        | A | T | 0.18 | 0.028 | 0.003 | 2.98E-17 | 0.17 | -0.001 | 0.009 | 0.950 |
| rs329124    | 5 | Intron:JADE2        | A | G | 0.57 | 0.016 | 0.003 | 1.96E-10 | 0.57 | -0.036 | 0.006 | 0.000 |
| rs35375873  | 5 | Intergenic          | G | C | 0.89 | 0.027 | 0.004 | 3.29E-11 | 0.88 | 0.030  | 0.010 | 0.004 |
| rs359431    | 5 | Intergenic          | C | T | 0.44 | 0.014 | 0.003 | 3.16E-08 | 0.45 | 0.006  | 0.006 | 0.340 |
| rs3843905   | 5 | Intergenic          | C | T | 0.60 | 0.015 | 0.003 | 5.41E-09 | 0.60 | 0.007  | 0.007 | 0.270 |
| rs3909281   | 5 | Intergenic          | G | T | 0.54 | 0.021 | 0.003 | 1.62E-16 | 0.53 | 0.019  | 0.006 | 0.003 |
| rs4044321   | 5 | Intron:TENM2        | A | G | 0.36 | 0.023 | 0.003 | 1.75E-17 | 0.36 | 0.007  | 0.007 | 0.320 |
| rs42417     | 5 | Intron:MCTP1        | T | C | 0.69 | 0.017 | 0.003 | 8.27E-10 | 0.68 | 0.012  | 0.007 | 0.092 |
| rs6452785   | 5 | Intron:TMEM161B-AS1 | C | T | 0.53 | 0.027 | 0.003 | 4.69E-26 | 0.53 | 0.019  | 0.006 | 0.002 |
| rs6874731   | 5 | Intron:RASGRF2      | G | T | 0.48 | 0.015 | 0.003 | 1.83E-09 | 0.49 | -0.002 | 0.006 | 0.780 |
| rs6890961   | 5 | Intron:TENM2        | C | T | 0.38 | 0.019 | 0.003 | 2.13E-13 | 0.38 | -0.001 | 0.007 | 0.870 |
| rs71592686  | 5 | Intron:ELOVL7       | C | T | 0.27 | 0.021 | 0.003 | 3.85E-13 | 0.28 | 0.005  | 0.007 | 0.520 |
| rs72780746  | 5 | Intergenic          | T | C | 0.83 | 0.026 | 0.003 | 2.05E-14 | 0.82 | 0.014  | 0.009 | 0.110 |
| rs72789626  | 5 | Intron:EFNA5        | T | A | 0.86 | 0.026 | 0.004 | 5.13E-12 | 0.87 | 0.008  | 0.010 | 0.380 |
| rs79476395  | 5 | Intergenic          | G | A | 0.07 | 0.033 | 0.005 | 1.04E-11 | 0.07 | -0.004 | 0.013 | 0.780 |
| rs986714    | 5 | Intergenic          | A | T | 0.55 | 0.016 | 0.003 | 4.13E-10 | 0.55 | 0.004  | 0.006 | 0.540 |
| rs1059490   | 6 | Utr3:HIST1H2BD      | T | C | 0.63 | 0.019 | 0.003 | 2.16E-12 | 0.63 | 0.006  | 0.007 | 0.370 |
| rs10698713  | 6 | Intron:TULP4        | G | A | 0.95 | 0.034 | 0.006 | 2.38E-09 | 0.95 | -0.014 | 0.014 | 0.320 |
| rs10945141  | 6 | Intron:ADGRB3       | A | G | 0.26 | 0.018 | 0.003 | 3.59E-10 | 0.26 | 0.012  | 0.007 | 0.100 |
| rs1150668   | 6 | Intron:ZNF192P1     | T | G | 0.58 | 0.019 | 0.003 | 8.54E-13 | 0.58 | 0.007  | 0.007 | 0.270 |
| rs118202    | 6 | Intron:REV3L        | G | T | 0.19 | 0.037 | 0.003 | 1.90E-29 | 0.19 | 0.025  | 0.008 | 0.002 |
| rs12195240  | 6 | Intergenic          | A | G | 0.28 | 0.025 | 0.003 | 1.08E-18 | 0.29 | -0.007 | 0.007 | 0.290 |
| rs12530388  | 6 | Utr5:ASCC3          | A | C | 0.49 | 0.018 | 0.003 | 5.83E-13 | 0.49 | 0.003  | 0.006 | 0.610 |
| rs160631    | 6 | Intron:ICK          | T | G | 0.27 | 0.017 | 0.003 | 1.87E-09 | 0.27 | 0.009  | 0.007 | 0.210 |



|             |   |                        |   |   |      |       |       |          |      |        |       |       |
|-------------|---|------------------------|---|---|------|-------|-------|----------|------|--------|-------|-------|
| rs1632941   | 6 | Intron:HLA-G           | T | C | 0.54 | 0.016 | 0.003 | 6.67E-10 | 0.54 | 0.000  | 0.007 | 0.990 |
| rs1737329   | 6 | Intergenic             | G | C | 0.74 | 0.017 | 0.003 | 5.08E-09 | 0.74 | -0.023 | 0.007 | 0.001 |
| rs17554906  | 6 | Intergenic             | C | G | 0.44 | 0.014 | 0.003 | 3.14E-08 | 0.45 | 0.001  | 0.007 | 0.910 |
| rs3218116   | 6 | Intergenic             | C | T | 0.74 | 0.020 | 0.003 | 1.05E-11 | 0.75 | 0.006  | 0.007 | 0.450 |
| rs3800227   | 6 | Intron:FOXO3           | G | A | 0.74 | 0.017 | 0.003 | 3.64E-09 | 0.74 | 0.014  | 0.007 | 0.052 |
| rs619087    | 6 | Intergenic             | G | A | 0.42 | 0.014 | 0.003 | 3.10E-08 | 0.43 | 0.003  | 0.006 | 0.700 |
| rs6568832   | 6 | Intron:MIR548H3 MMS22L | A | G | 0.75 | 0.019 | 0.003 | 1.74E-10 | 0.75 | 0.012  | 0.007 | 0.110 |
| rs6932350   | 6 | Intron:LOC105374988    | A | T | 0.45 | 0.015 | 0.003 | 5.13E-09 | 0.46 | 0.005  | 0.006 | 0.460 |
| rs6936160   | 6 | Intergenic             | T | C | 0.70 | 0.020 | 0.003 | 4.20E-13 | 0.70 | -0.014 | 0.007 | 0.044 |
| rs73008357  | 6 | Intergenic             | A | C | 0.88 | 0.022 | 0.004 | 2.44E-08 | 0.88 | -0.003 | 0.010 | 0.750 |
| rs7743165   | 6 | Intergenic             | G | T | 0.50 | 0.019 | 0.003 | 4.15E-14 | 0.49 | 0.012  | 0.006 | 0.051 |
| rs79180767  | 6 | Intergenic             | T | C | 0.25 | 0.020 | 0.003 | 7.00E-12 | 0.32 | 0.012  | 0.020 | 0.550 |
| rs9331343   | 6 | Intron:TMEM242         | T | C | 0.43 | 0.014 | 0.003 | 3.90E-08 | 0.43 | 0.002  | 0.007 | 0.720 |
| rs10233018  | 7 | Intergenic             | G | A | 0.52 | 0.025 | 0.003 | 4.77E-22 | 0.52 | 0.022  | 0.006 | 0.001 |
| rs10259715  | 7 | Intergenic             | T | A | 0.79 | 0.019 | 0.003 | 6.42E-09 | 0.74 | 0.013  | 0.021 | 0.530 |
| rs10272990  | 7 | Intergenic             | T | C | 0.67 | 0.021 | 0.003 | 1.27E-14 | 0.66 | -0.005 | 0.007 | 0.470 |
| rs10279261  | 7 | Intron:EXOC4           | G | A | 0.38 | 0.019 | 0.003 | 6.05E-13 | 0.39 | 0.010  | 0.007 | 0.130 |
| rs1030015   | 7 | Intron:MAGI2           | T | G | 0.52 | 0.014 | 0.003 | 2.15E-08 | 0.51 | 0.021  | 0.006 | 0.001 |
| rs10953957  | 7 | Intergenic             | A | G | 0.39 | 0.014 | 0.003 | 3.66E-08 | 0.39 | 0.026  | 0.007 | 0.000 |
| rs112913817 | 7 | Intergenic             | G | A | 0.01 | 0.078 | 0.012 | 9.28E-11 | 0.01 | 0.008  | 0.032 | 0.810 |
| rs11766326  | 7 | Intron:IMMP2L          | T | C | 0.49 | 0.018 | 0.003 | 1.79E-11 | 0.48 | 0.003  | 0.006 | 0.690 |
| rs11768481  | 7 | Intron:DLX6-AS1        | C | A | 0.66 | 0.019 | 0.003 | 5.23E-12 | 0.65 | 0.002  | 0.007 | 0.810 |
| rs13237637  | 7 | Intron:SDK1            | G | C | 0.52 | 0.024 | 0.003 | 1.54E-20 | 0.51 | 0.004  | 0.006 | 0.580 |
| rs13437771  | 7 | Intron:ZNF789          | A | G | 0.85 | 0.027 | 0.004 | 1.39E-14 | 0.84 | 0.028  | 0.009 | 0.002 |
| rs1561112   | 7 | Intron:LRGUK           | T | C | 0.59 | 0.015 | 0.003 | 3.84E-09 | 0.59 | -0.001 | 0.007 | 0.930 |
| rs1799068   | 7 | Intergenic             | T | G | 0.38 | 0.017 | 0.003 | 2.59E-10 | 0.38 | -0.012 | 0.007 | 0.058 |
| rs4727189   | 7 | Intron:ZNF804B         | C | T | 0.34 | 0.015 | 0.003 | 3.00E-08 | 0.34 | -0.005 | 0.007 | 0.480 |
| rs6948707   | 7 | Intron:MAD1L1          | G | T | 0.42 | 0.024 | 0.003 | 4.24E-21 | 0.42 | 0.008  | 0.007 | 0.220 |
| rs6968380   | 7 | Intergenic             | G | A | 0.32 | 0.023 | 0.003 | 1.05E-17 | 0.32 | 0.015  | 0.007 | 0.028 |

|            |   |                      |   |   |      |       |       |          |      |        |       |       |
|------------|---|----------------------|---|---|------|-------|-------|----------|------|--------|-------|-------|
| rs76841737 | 7 | Intergenic           | C | G | 0.90 | 0.023 | 0.004 | 3.26E-08 | 0.90 | 0.006  | 0.011 | 0.550 |
| rs77283305 | 7 | Intron:CHCHD3        | G | A | 0.69 | 0.015 | 0.003 | 3.91E-08 | 0.70 | 0.019  | 0.007 | 0.006 |
| rs7802996  | 7 | Intron:MAGI2         | C | T | 0.83 | 0.021 | 0.003 | 1.06E-09 | 0.83 | -0.006 | 0.009 | 0.520 |
| rs7809303  | 7 | Intron:AUTS2         | G | A | 0.68 | 0.021 | 0.003 | 3.48E-15 | 0.67 | -0.023 | 0.007 | 0.001 |
| rs79631993 | 7 | Intron:AUTS2         | A | C | 0.78 | 0.017 | 0.003 | 3.67E-08 | 0.66 | -0.017 | 0.019 | 0.380 |
| rs11780471 | 8 | Intergenic           | G | A | 0.94 | 0.039 | 0.005 | 1.57E-13 | 0.94 | -0.025 | 0.013 | 0.057 |
| rs11783093 | 8 | Intergenic           | C | T | 0.84 | 0.047 | 0.004 | 2.07E-41 | 0.84 | -0.009 | 0.009 | 0.320 |
| rs13261666 | 8 | Intron:TOX           | G | T | 0.48 | 0.020 | 0.003 | 4.36E-15 | 0.49 | 0.015  | 0.006 | 0.020 |
| rs1565735  | 8 | Intergenic           | T | A | 0.80 | 0.019 | 0.003 | 1.33E-09 | 0.80 | -0.006 | 0.008 | 0.470 |
| rs2063976  | 8 | Intergenic           | C | T | 0.34 | 0.020 | 0.003 | 7.45E-14 | 0.34 | -0.017 | 0.007 | 0.014 |
| rs290601   | 8 | Intergenic           | T | C | 0.27 | 0.016 | 0.003 | 1.14E-08 | 0.28 | 0.018  | 0.007 | 0.012 |
| rs2952251  | 8 | Intron:MSRA          | G | A | 0.74 | 0.016 | 0.003 | 4.24E-08 | 0.74 | 0.018  | 0.008 | 0.025 |
| rs3850736  | 8 | Intron:LOC102724623  | G | C | 0.47 | 0.019 | 0.003 | 6.43E-14 | 0.47 | -0.022 | 0.006 | 0.001 |
| rs4326350  | 8 | Intron:XKR6          | C | G | 0.51 | 0.018 | 0.003 | 5.16E-12 | 0.51 | 0.042  | 0.006 | 0.000 |
| rs6986430  | 8 | Intron:RUNX1T1       | T | C | 0.78 | 0.024 | 0.003 | 1.99E-15 | 0.78 | 0.013  | 0.008 | 0.100 |
| rs6993429  | 8 | Intergenic           | C | A | 0.55 | 0.019 | 0.003 | 9.87E-14 | 0.55 | 0.006  | 0.006 | 0.340 |
| rs7836565  | 8 | Intron:PXDNL         | C | T | 0.28 | 0.016 | 0.003 | 4.36E-08 | 0.28 | -0.006 | 0.007 | 0.360 |
| rs9987376  | 8 | Intergenic           | T | G | 0.43 | 0.021 | 0.003 | 2.01E-15 | 0.42 | 0.009  | 0.006 | 0.150 |
| rs10858334 | 9 | Utr3:OLFM1           | G | C | 0.14 | 0.023 | 0.004 | 1.18E-09 | 0.14 | 0.033  | 0.010 | 0.001 |
| rs10966092 | 9 | Intron:ELAVL2        | T | C | 0.73 | 0.021 | 0.003 | 1.12E-12 | 0.73 | 0.013  | 0.007 | 0.061 |
| rs10969352 | 9 | Intergenic           | A | T | 0.50 | 0.014 | 0.003 | 1.82E-08 | 0.49 | 0.016  | 0.006 | 0.011 |
| rs11791671 | 9 | Intron:RFX3          | T | C | 0.07 | 0.028 | 0.005 | 4.24E-08 | 0.07 | 0.009  | 0.013 | 0.470 |
| rs1759433  | 9 | Intron:GAPVD1        | A | G | 0.48 | 0.015 | 0.003 | 1.69E-09 | 0.48 | -0.022 | 0.006 | 0.001 |
| rs1927901  | 9 | Intergenic           | T | C | 0.45 | 0.014 | 0.003 | 3.10E-08 | 0.45 | 0.011  | 0.006 | 0.091 |
| rs1930371  | 9 | Intergenic           | C | T | 0.76 | 0.017 | 0.003 | 7.09E-09 | 0.76 | -0.010 | 0.007 | 0.170 |
| rs1931431  | 9 | Intergenic           | C | G | 0.48 | 0.018 | 0.003 | 8.56E-13 | 0.48 | 0.006  | 0.006 | 0.340 |
| rs2378662  | 9 | Intron:LOC101927575  | A | G | 0.54 | 0.015 | 0.003 | 2.67E-09 | 0.54 | 0.007  | 0.006 | 0.260 |
| rs34553878 | 9 | Nonsynonymous:PRRC2B | G | A | 0.11 | 0.025 | 0.004 | 1.17E-09 | 0.11 | -0.011 | 0.010 | 0.260 |
| rs3847244  | 9 | Intergenic           | T | C | 0.47 | 0.019 | 0.003 | 2.60E-13 | 0.46 | -0.002 | 0.006 | 0.780 |

|            |    |                          |   |   |      |       |       |          |      |        |       |       |
|------------|----|--------------------------|---|---|------|-------|-------|----------|------|--------|-------|-------|
| rs4837631  | 9  | Intron:BRINP1            | C | T | 0.55 | 0.015 | 0.003 | 2.03E-09 | 0.55 | 0.011  | 0.006 | 0.094 |
| rs4877285  | 9  | Intergenic               | G | A | 0.33 | 0.018 | 0.003 | 2.10E-11 | 0.33 | 0.029  | 0.007 | 0.000 |
| rs6474609  | 9  | Intergenic               | T | A | 0.41 | 0.016 | 0.003 | 1.71E-09 | 0.41 | 0.010  | 0.006 | 0.140 |
| rs7024924  | 9  | Intergenic               | C | T | 0.17 | 0.019 | 0.003 | 1.90E-08 | 0.18 | 0.028  | 0.008 | 0.001 |
| rs7026534  | 9  | Intron:MED27             | T | G | 0.30 | 0.017 | 0.003 | 2.68E-09 | 0.30 | 0.024  | 0.007 | 0.001 |
| rs7867822  | 9  | Intron:FOCAD             | A | G | 0.33 | 0.015 | 0.003 | 2.76E-08 | 0.33 | -0.025 | 0.007 | 0.000 |
| rs10885480 | 10 | Intron:NRAP              | T | C | 0.72 | 0.019 | 0.003 | 3.83E-11 | 0.71 | 0.001  | 0.007 | 0.900 |
| rs10905461 | 10 | Intergenic               | T | C | 0.25 | 0.016 | 0.003 | 2.36E-08 | 0.24 | -0.001 | 0.007 | 0.910 |
| rs11191269 | 10 | Intron:GBF1              | G | C | 0.19 | 0.018 | 0.003 | 4.61E-08 | 0.20 | -0.010 | 0.008 | 0.220 |
| rs11192347 | 10 | Intron:SORCS3            | G | A | 0.90 | 0.027 | 0.004 | 6.15E-10 | 0.89 | -0.005 | 0.011 | 0.620 |
| rs11258417 | 10 | Intron:BEND7             | C | T | 0.61 | 0.015 | 0.003 | 2.71E-08 | 0.61 | 0.024  | 0.007 | 0.000 |
| rs11594623 | 10 | Intergenic               | C | T | 0.23 | 0.027 | 0.003 | 7.45E-20 | 0.24 | 0.006  | 0.008 | 0.410 |
| rs12244388 | 10 | Intron:AS3MT BORCS7-ASMT | A | G | 0.35 | 0.026 | 0.003 | 4.31E-22 | 0.35 | 0.003  | 0.007 | 0.650 |
| rs1291821  | 10 | Intron:CELF2 CELF2-AS2   | G | A | 0.53 | 0.015 | 0.003 | 1.39E-08 | 0.53 | 0.015  | 0.006 | 0.018 |
| rs1733760  | 10 | Intron:PCDH15            | C | T | 0.51 | 0.015 | 0.003 | 6.70E-09 | 0.51 | 0.011  | 0.006 | 0.086 |
| rs2796793  | 10 | Intergenic               | A | G | 0.45 | 0.015 | 0.003 | 1.55E-08 | 0.46 | 0.009  | 0.006 | 0.150 |
| rs28408682 | 10 | Intergenic               | G | A | 0.60 | 0.017 | 0.003 | 1.41E-10 | 0.59 | 0.017  | 0.007 | 0.010 |
| rs34970111 | 10 | Intron:ITPRIP            | C | T | 0.54 | 0.015 | 0.003 | 1.28E-08 | 0.54 | 0.004  | 0.006 | 0.580 |
| rs4752018  | 10 | Intron:SHTN1             | A | C | 0.23 | 0.019 | 0.003 | 4.42E-10 | 0.23 | 0.020  | 0.008 | 0.007 |
| rs7072776  | 10 | Intergenic               | A | G | 0.29 | 0.022 | 0.003 | 5.66E-15 | 0.28 | 0.006  | 0.007 | 0.390 |
| rs7901883  | 10 | Intron:BTRC              | G | A | 0.77 | 0.019 | 0.003 | 1.98E-10 | 0.77 | -0.009 | 0.007 | 0.250 |
| rs7920501  | 10 | Intergenic               | T | A | 0.53 | 0.016 | 0.003 | 1.25E-09 | 0.54 | 0.002  | 0.006 | 0.800 |
| rs7921378  | 10 | Intron:ARID5B            | G | C | 0.52 | 0.023 | 0.003 | 6.10E-20 | 0.52 | -0.015 | 0.007 | 0.021 |
| rs9423279  | 10 | Intergenic               | C | G | 0.36 | 0.019 | 0.003 | 3.06E-12 | 0.35 | -0.005 | 0.007 | 0.450 |
| rs9787523  | 10 | Intron:SORCS3            | T | C | 0.58 | 0.016 | 0.003 | 1.42E-09 | 0.58 | 0.018  | 0.007 | 0.005 |
| rs1106363  | 11 | Intron:NTM               | T | C | 0.34 | 0.017 | 0.003 | 9.20E-11 | 0.35 | 0.011  | 0.007 | 0.110 |
| rs1381775  | 11 | Intergenic               | T | C | 0.29 | 0.016 | 0.003 | 2.79E-08 | 0.28 | -0.012 | 0.007 | 0.099 |
| rs1713676  | 11 | Intergenic               | A | G | 0.48 | 0.017 | 0.003 | 5.38E-11 | 0.48 | 0.004  | 0.006 | 0.500 |
| rs1834306  | 11 | Intron:MIR100HG          | A | G | 0.42 | 0.015 | 0.003 | 1.96E-08 | 0.42 | 0.024  | 0.007 | 0.000 |

|            |    |                     |   |   |      |       |       |          |      |        |       |       |
|------------|----|---------------------|---|---|------|-------|-------|----------|------|--------|-------|-------|
| rs1944689  | 11 | Intergenic          | T | G | 0.79 | 0.018 | 0.003 | 1.27E-08 | 0.79 | -0.003 | 0.008 | 0.700 |
| rs2010921  | 11 | Intron:NTM          | A | G | 0.31 | 0.017 | 0.003 | 2.47E-10 | 0.31 | 0.003  | 0.007 | 0.620 |
| rs2155646  | 11 | Intron:NCAM1        | C | T | 0.40 | 0.038 | 0.003 | 9.44E-48 | 0.40 | -0.010 | 0.007 | 0.120 |
| rs238896   | 11 | Intron:ZBTB16       | G | A | 0.51 | 0.017 | 0.003 | 3.65E-11 | 0.51 | -0.005 | 0.006 | 0.470 |
| rs2939756  | 11 | Intron:LRRC4C       | G | A | 0.52 | 0.016 | 0.003 | 7.45E-10 | 0.53 | 0.005  | 0.006 | 0.400 |
| rs2959084  | 11 | Intron:PHF21A       | A | G | 0.70 | 0.017 | 0.003 | 9.82E-10 | 0.70 | -0.010 | 0.007 | 0.130 |
| rs3740977  | 11 | Intron:DGKZ         | C | T | 0.17 | 0.020 | 0.003 | 1.17E-08 | 0.17 | 0.004  | 0.009 | 0.620 |
| rs4275621  | 11 | Intergenic          | A | G | 0.62 | 0.021 | 0.003 | 3.76E-16 | 0.62 | 0.007  | 0.007 | 0.280 |
| rs540860   | 11 | Intergenic          | G | A | 0.54 | 0.018 | 0.003 | 5.75E-12 | 0.54 | -0.013 | 0.006 | 0.047 |
| rs586699   | 11 | Intron:FAT3         | G | A | 0.46 | 0.015 | 0.003 | 7.29E-09 | 0.46 | 0.005  | 0.006 | 0.410 |
| rs61884449 | 11 | Intron:NRXN2        | T | C | 0.15 | 0.020 | 0.004 | 2.32E-08 | 0.15 | -0.001 | 0.009 | 0.940 |
| rs61886926 | 11 | Intron:RPS6KA4      | C | T | 0.62 | 0.018 | 0.003 | 7.30E-12 | 0.61 | 0.010  | 0.007 | 0.110 |
| rs62618693 | 11 | Nonsynonymous:QSER1 | C | T | 0.96 | 0.035 | 0.006 | 2.09E-08 | 0.96 | 0.110  | 0.016 | 0.000 |
| rs6265     | 11 | Nonsynonymous:BDNF  | C | T | 0.81 | 0.029 | 0.003 | 2.81E-19 | 0.81 | 0.016  | 0.008 | 0.054 |
| rs644740   | 11 | Intron:OVOL1        | C | T | 0.54 | 0.014 | 0.003 | 3.67E-08 | 0.54 | 0.017  | 0.006 | 0.008 |
| rs76460663 | 11 | Intergenic          | C | G | 0.96 | 0.042 | 0.006 | 4.15E-11 | 0.95 | -0.001 | 0.016 | 0.960 |
| rs78239456 | 11 | Intron:NCAM1        | A | T | 0.62 | 0.019 | 0.003 | 9.37E-12 | 0.53 | -0.012 | 0.020 | 0.550 |
| rs7929518  | 11 | Intron:EED          | G | A | 0.77 | 0.019 | 0.003 | 2.55E-10 | 0.77 | 0.009  | 0.008 | 0.250 |
| rs7943721  | 11 | Intergenic          | G | A | 0.17 | 0.021 | 0.003 | 3.58E-10 | 0.17 | 0.007  | 0.009 | 0.420 |
| rs11057005 | 12 | Intron:LMO3         | A | G | 0.56 | 0.016 | 0.003 | 9.12E-10 | 0.55 | 0.007  | 0.006 | 0.290 |
| rs1109480  | 12 | Intron:CABP1        | G | A | 0.62 | 0.017 | 0.003 | 1.84E-10 | 0.61 | 0.034  | 0.007 | 0.000 |
| rs11611651 | 12 | Intron:GOLGA3       | A | G | 0.09 | 0.027 | 0.005 | 2.05E-09 | 0.09 | 0.027  | 0.011 | 0.018 |
| rs13906    | 12 | Utr3:MCRS1          | C | T | 0.89 | 0.025 | 0.004 | 1.98E-09 | 0.89 | 0.029  | 0.010 | 0.005 |
| rs4759229  | 12 | Intron:ERBB3        | G | A | 0.66 | 0.016 | 0.003 | 6.53E-09 | 0.66 | 0.006  | 0.007 | 0.360 |
| rs7134009  | 12 | Intergenic          | T | C | 0.71 | 0.016 | 0.003 | 4.30E-08 | 0.71 | -0.004 | 0.007 | 0.570 |
| rs77215829 | 12 | Intron:HECTD4       | A | C | 0.87 | 0.024 | 0.004 | 2.02E-10 | 0.86 | 0.025  | 0.010 | 0.007 |
| rs7969559  | 12 | Intron:CPSF6        | A | G | 0.29 | 0.017 | 0.003 | 1.53E-09 | 0.29 | 0.022  | 0.007 | 0.002 |
| rs1108130  | 13 | Exon:LINC00554      | A | T | 0.21 | 0.024 | 0.003 | 1.57E-14 | 0.22 | 0.003  | 0.008 | 0.740 |
| rs12855717 | 13 | Intergenic          | T | C | 0.54 | 0.016 | 0.003 | 1.22E-09 | 0.54 | 0.005  | 0.006 | 0.480 |

|            |    |                           |   |   |      |       |       |          |      |        |       |       |
|------------|----|---------------------------|---|---|------|-------|-------|----------|------|--------|-------|-------|
| rs1413119  | 13 | Intergenic                | C | T | 0.60 | 0.015 | 0.003 | 4.77E-09 | 0.60 | 0.021  | 0.007 | 0.002 |
| rs17197663 | 13 | Utr5:POSTN                | G | A | 0.88 | 0.022 | 0.004 | 2.06E-08 | 0.87 | 0.006  | 0.010 | 0.540 |
| rs1772572  | 13 | Intergenic                | C | A | 0.68 | 0.017 | 0.003 | 5.62E-10 | 0.67 | -0.002 | 0.007 | 0.770 |
| rs3098272  | 13 | Intergenic                | A | C | 0.20 | 0.018 | 0.003 | 2.08E-08 | 0.20 | -0.013 | 0.008 | 0.100 |
| rs4264267  | 13 | Intron:TRPC4              | T | C | 0.53 | 0.015 | 0.003 | 6.82E-09 | 0.53 | 0.008  | 0.006 | 0.240 |
| rs4886207  | 13 | Intron:DIAPH3             | T | C | 0.36 | 0.016 | 0.003 | 8.78E-10 | 0.36 | 0.013  | 0.007 | 0.050 |
| rs55786907 | 13 | Intergenic                | G | A | 0.16 | 0.019 | 0.004 | 1.84E-08 | 0.16 | 0.017  | 0.009 | 0.048 |
| rs56367474 | 13 | Intergenic                | C | T | 0.70 | 0.017 | 0.003 | 4.20E-10 | 0.70 | -0.017 | 0.007 | 0.015 |
| rs61959481 | 13 | Intergenic                | G | A | 0.79 | 0.020 | 0.003 | 7.95E-11 | 0.79 | -0.006 | 0.008 | 0.430 |
| rs7333559  | 13 | Intron:CLYBL LOC101927437 | G | A | 0.22 | 0.023 | 0.003 | 5.94E-14 | 0.21 | 0.017  | 0.008 | 0.031 |
| rs75674569 | 13 | Intron:HS6ST3             | G | A | 0.90 | 0.025 | 0.004 | 2.58E-09 | 0.90 | -0.013 | 0.011 | 0.240 |
| rs9538162  | 13 | Intergenic                | C | T | 0.42 | 0.017 | 0.003 | 1.76E-11 | 0.42 | -0.022 | 0.006 | 0.001 |
| rs9540731  | 13 | Intron:PCDH9              | C | T | 0.49 | 0.018 | 0.003 | 3.42E-12 | 0.49 | 0.009  | 0.006 | 0.140 |
| rs9545155  | 13 | Intergenic                | T | C | 0.52 | 0.016 | 0.003 | 3.04E-10 | 0.53 | 0.013  | 0.006 | 0.044 |
| rs12878369 | 14 | Intergenic                | A | C | 0.41 | 0.017 | 0.003 | 1.60E-11 | 0.41 | -0.002 | 0.007 | 0.710 |
| rs1381287  | 14 | Intergenic                | T | C | 0.47 | 0.018 | 0.003 | 1.81E-12 | 0.46 | 0.011  | 0.006 | 0.082 |
| rs1811739  | 14 | Intron:LINC02288          | A | G | 0.25 | 0.018 | 0.003 | 5.97E-10 | 0.25 | 0.009  | 0.007 | 0.220 |
| rs2145451  | 14 | Intergenic                | T | C | 0.81 | 0.020 | 0.003 | 5.44E-10 | 0.81 | -0.001 | 0.008 | 0.940 |
| rs2925128  | 14 | Intergenic                | T | C | 0.39 | 0.017 | 0.003 | 3.67E-10 | 0.39 | -0.007 | 0.007 | 0.320 |
| rs34940743 | 14 | Intron:NRXN3              | G | A | 0.35 | 0.016 | 0.003 | 2.80E-09 | 0.34 | 0.009  | 0.007 | 0.200 |
| rs55913542 | 14 | Intron:BCL11B             | T | G | 0.18 | 0.019 | 0.003 | 3.25E-08 | 0.18 | 0.015  | 0.008 | 0.071 |
| rs8005334  | 14 | Intron:NRXN3              | G | T | 0.36 | 0.017 | 0.003 | 3.44E-10 | 0.36 | -0.022 | 0.007 | 0.001 |
| rs9323328  | 14 | Intergenic                | A | G | 0.46 | 0.014 | 0.003 | 2.55E-08 | 0.46 | 0.024  | 0.006 | 0.000 |
| rs12442563 | 15 | Intergenic                | G | T | 0.78 | 0.023 | 0.003 | 3.13E-14 | 0.77 | 0.010  | 0.008 | 0.200 |
| rs1435672  | 15 | Intergenic                | C | T | 0.56 | 0.014 | 0.003 | 3.82E-08 | 0.56 | 0.016  | 0.006 | 0.012 |
| rs1435741  | 15 | Intron:SEMA6D             | A | G | 0.43 | 0.018 | 0.003 | 1.09E-12 | 0.43 | -0.002 | 0.006 | 0.720 |
| rs2289791  | 15 | Intron:SMAD3              | G | T | 0.75 | 0.018 | 0.003 | 2.01E-09 | 0.75 | 0.010  | 0.007 | 0.180 |
| rs281296   | 15 | Intron:SEMA6D             | A | G | 0.36 | 0.025 | 0.003 | 1.59E-20 | 0.35 | 0.003  | 0.007 | 0.630 |
| rs4310804  | 15 | Intron:NR2F2-AS1          | C | G | 0.75 | 0.018 | 0.003 | 7.55E-10 | 0.75 | 0.010  | 0.007 | 0.160 |

|             |    |                     |   |   |      |       |       |          |      |        |       |       |
|-------------|----|---------------------|---|---|------|-------|-------|----------|------|--------|-------|-------|
| rs56902655  | 15 | Intergenic          | T | G | 0.86 | 0.022 | 0.004 | 4.09E-09 | 0.86 | -0.010 | 0.009 | 0.300 |
| rs60833441  | 15 | Intergenic          | A | G | 0.54 | 0.014 | 0.003 | 2.28E-08 | 0.54 | 0.002  | 0.006 | 0.790 |
| rs62007780  | 15 | Intron:LINGO1       | G | T | 0.58 | 0.016 | 0.003 | 7.48E-10 | 0.59 | 0.001  | 0.007 | 0.940 |
| rs8027457   | 15 | Intron:IGF1R        | C | T | 0.51 | 0.015 | 0.003 | 1.88E-09 | 0.51 | 0.011  | 0.006 | 0.080 |
| rs1050847   | 16 | Utr3:ZCCHC14        | C | T | 0.44 | 0.015 | 0.003 | 7.37E-09 | 0.43 | -0.007 | 0.006 | 0.310 |
| rs11076962  | 16 | Intergenic          | C | T | 0.28 | 0.018 | 0.003 | 1.20E-10 | 0.28 | 0.008  | 0.007 | 0.260 |
| rs1139897   | 16 | Nonsynonymous:RHOT2 | G | A | 0.77 | 0.024 | 0.003 | 1.77E-15 | 0.76 | 0.004  | 0.008 | 0.580 |
| rs11642231  | 16 | Intron:SPG7         | G | A | 0.63 | 0.016 | 0.003 | 3.44E-09 | 0.62 | 0.013  | 0.007 | 0.047 |
| rs117657830 | 16 | Intergenic          | A | G | 0.96 | 0.038 | 0.006 | 3.18E-09 | 0.96 | -0.015 | 0.016 | 0.350 |
| rs12918191  | 16 | Intergenic          | A | G | 0.76 | 0.020 | 0.003 | 3.14E-11 | 0.76 | -0.013 | 0.007 | 0.091 |
| rs4785187   | 16 | Intron:ZNF423       | A | G | 0.22 | 0.020 | 0.003 | 6.55E-11 | 0.23 | -0.006 | 0.008 | 0.460 |
| rs4788676   | 16 | Intron:ZFHX3        | T | C | 0.77 | 0.018 | 0.003 | 4.92E-09 | 0.77 | -0.010 | 0.008 | 0.190 |
| rs61537885  | 16 | Intergenic          | T | C | 0.96 | 0.040 | 0.007 | 8.06E-09 | 0.96 | -0.004 | 0.046 | 0.930 |
| rs62052916  | 16 | Intron:LINC01572    | A | T | 0.93 | 0.032 | 0.005 | 1.62E-10 | 0.92 | 0.012  | 0.012 | 0.330 |
| rs6497840   | 16 | Intergenic          | A | G | 0.71 | 0.023 | 0.003 | 2.01E-15 | 0.71 | -0.002 | 0.007 | 0.790 |
| rs7188873   | 16 | Intron:TNRC6A       | G | A | 0.61 | 0.020 | 0.003 | 8.46E-15 | 0.61 | 0.024  | 0.007 | 0.000 |
| rs7192140   | 16 | Intron:GRIN2A       | T | C | 0.50 | 0.017 | 0.003 | 3.40E-11 | 0.50 | -0.006 | 0.006 | 0.360 |
| rs8050598   | 16 | Intergenic          | T | C | 0.25 | 0.019 | 0.003 | 1.76E-10 | 0.26 | -0.006 | 0.008 | 0.400 |
| rs9302604   | 16 | Intergenic          | G | A | 0.44 | 0.019 | 0.003 | 3.29E-13 | 0.43 | 0.020  | 0.006 | 0.002 |
| rs9922607   | 16 | Intergenic          | C | T | 0.80 | 0.022 | 0.003 | 3.42E-12 | 0.80 | 0.008  | 0.008 | 0.310 |
| rs9936784   | 16 | Intergenic          | G | T | 0.53 | 0.014 | 0.003 | 4.33E-08 | 0.53 | 0.018  | 0.006 | 0.005 |
| rs9941217   | 16 | Intergenic          | C | G | 0.65 | 0.019 | 0.003 | 3.50E-12 | 0.64 | 0.002  | 0.007 | 0.810 |
| rs11078713  | 17 | Intron:CHD3         | A | G | 0.58 | 0.015 | 0.003 | 1.59E-08 | 0.58 | -0.004 | 0.007 | 0.530 |
| rs11651955  | 17 | Intergenic          | G | A | 0.50 | 0.014 | 0.003 | 3.74E-08 | 0.51 | -0.004 | 0.006 | 0.540 |
| rs17692129  | 17 | Intron:NSF          | T | C | 0.33 | 0.020 | 0.003 | 4.57E-13 | 0.34 | 0.017  | 0.007 | 0.017 |
| rs2344976   | 17 | Intron:ZNF207       | T | C | 0.39 | 0.015 | 0.003 | 7.98E-09 | 0.38 | -0.005 | 0.007 | 0.450 |
| rs2587507   | 17 | Intergenic          | T | C | 0.50 | 0.015 | 0.003 | 8.69E-09 | 0.49 | -0.004 | 0.006 | 0.490 |
| rs28441558  | 17 | Intron:CHD3         | T | C | 0.94 | 0.036 | 0.006 | 1.24E-10 | 0.94 | -0.014 | 0.014 | 0.300 |
| rs2938134   | 17 | Intergenic          | C | A | 0.33 | 0.018 | 0.003 | 3.14E-10 | 0.33 | 0.004  | 0.007 | 0.540 |

|             |    |                      |   |   |      |       |       |          |      |        |       |       |
|-------------|----|----------------------|---|---|------|-------|-------|----------|------|--------|-------|-------|
| rs3764351   | 17 | Intron:PNMT          | G | A | 0.34 | 0.015 | 0.003 | 3.89E-08 | 0.34 | 0.027  | 0.007 | 0.000 |
| rs4790874   | 17 | Intron:SMG6          | T | C | 0.53 | 0.017 | 0.003 | 8.43E-12 | 0.53 | -0.020 | 0.006 | 0.002 |
| rs67777803  | 17 | Intron:SEZ6          | G | T | 0.83 | 0.025 | 0.003 | 3.18E-13 | 0.83 | 0.004  | 0.008 | 0.650 |
| rs72836318  | 17 | Intron:KANSL1        | T | C | 0.75 | 0.017 | 0.003 | 7.00E-09 | 0.75 | 0.023  | 0.007 | 0.002 |
| rs75919030  | 17 | Intron:CA10          | T | C | 0.73 | 0.021 | 0.003 | 3.35E-13 | 0.73 | -0.004 | 0.007 | 0.620 |
| rs11872397  | 18 | Intron:ZNF407        | G | A | 0.75 | 0.017 | 0.003 | 5.20E-09 | 0.75 | -0.001 | 0.007 | 0.950 |
| rs1373178   | 18 | Intron:DCC           | T | G | 0.41 | 0.020 | 0.003 | 4.16E-15 | 0.41 | -0.010 | 0.007 | 0.120 |
| rs2359180   | 18 | Intergenic           | A | G | 0.63 | 0.014 | 0.003 | 4.98E-08 | 0.73 | 0.002  | 0.010 | 0.840 |
| rs34342129  | 18 | Intergenic           | T | C | 0.49 | 0.014 | 0.003 | 2.13E-08 | 0.49 | 0.004  | 0.006 | 0.580 |
| rs4476253   | 18 | Intergenic           | G | A | 0.76 | 0.019 | 0.003 | 5.78E-10 | 0.76 | 0.012  | 0.008 | 0.110 |
| rs62098013  | 18 | Intron:DCC           | A | G | 0.37 | 0.018 | 0.003 | 2.24E-11 | 0.37 | -0.001 | 0.007 | 0.900 |
| rs67050670  | 18 | Intergenic           | A | G | 0.77 | 0.020 | 0.003 | 2.34E-11 | 0.77 | 0.017  | 0.008 | 0.029 |
| rs71367544  | 18 | Intergenic           | T | C | 0.20 | 0.021 | 0.003 | 8.54E-11 | 0.20 | 0.020  | 0.008 | 0.012 |
| rs72898831  | 18 | Intergenic           | A | G | 0.85 | 0.024 | 0.004 | 4.14E-12 | 0.85 | 0.028  | 0.009 | 0.002 |
| rs72938304  | 18 | Intergenic           | G | A | 0.89 | 0.027 | 0.004 | 1.36E-11 | 0.88 | -0.023 | 0.010 | 0.021 |
| rs7505855   | 18 | Intron:NOL4          | C | T | 0.41 | 0.017 | 0.003 | 5.31E-11 | 0.41 | -0.010 | 0.007 | 0.130 |
| rs8083764   | 18 | Intron:DCC           | G | T | 0.69 | 0.016 | 0.003 | 7.97E-09 | 0.69 | -0.014 | 0.007 | 0.044 |
| rs8096225   | 18 | Intron:MIR924HG      | C | A | 0.70 | 0.016 | 0.003 | 2.63E-08 | 0.70 | 0.012  | 0.007 | 0.100 |
| rs10853981  | 19 | Intergenic           | A | G | 0.33 | 0.015 | 0.003 | 4.88E-08 | 0.33 | 0.028  | 0.007 | 0.000 |
| rs1126757   | 19 | Synonymous:IL11      | T | C | 0.47 | 0.014 | 0.003 | 2.92E-08 | 0.48 | -0.005 | 0.007 | 0.480 |
| rs113230003 | 19 | Intron:PGPEP1        | G | A | 0.75 | 0.019 | 0.003 | 1.05E-10 | 0.75 | 0.012  | 0.008 | 0.130 |
| rs117734003 | 19 | Intron:SYT3          | C | G | 0.07 | 0.030 | 0.005 | 2.57E-09 | 0.07 | 0.030  | 0.013 | 0.021 |
| rs76608582  | 19 | Intron:HDGFL2        | C | A | 0.95 | 0.035 | 0.006 | 4.88E-09 | 0.95 | 0.013  | 0.016 | 0.440 |
| rs8103660   | 19 | Intron:ELL           | C | T | 0.35 | 0.016 | 0.003 | 3.03E-09 | 0.36 | -0.004 | 0.007 | 0.590 |
| rs1555445   | 20 | Upstream:NOL4L-DT    | T | A | 0.32 | 0.019 | 0.003 | 7.75E-12 | 0.32 | 0.005  | 0.007 | 0.450 |
| rs3810496   | 20 | Intron:ZBTB46        | C | T | 0.62 | 0.016 | 0.003 | 1.54E-09 | 0.62 | 0.019  | 0.007 | 0.004 |
| rs6011779   | 20 | Intron:CHRNA4        | C | T | 0.19 | 0.019 | 0.003 | 2.83E-09 | 0.19 | 0.013  | 0.009 | 0.120 |
| rs6050446   | 20 | Nonsynonymous:ENTPD6 | G | A | 0.97 | 0.054 | 0.008 | 8.80E-13 | 0.97 | 0.043  | 0.019 | 0.022 |
| rs6058782   | 20 | Intergenic           | T | C | 0.91 | 0.030 | 0.004 | 1.78E-11 | 0.91 | 0.011  | 0.011 | 0.340 |

|           |    |               |   |   |      |        |        |          |      |        |       |       |
|-----------|----|---------------|---|---|------|--------|--------|----------|------|--------|-------|-------|
| rs6073075 | 20 | Intergenic    | T | A | 0.18 | 0.019  | 0.003  | 2.44E-08 | 0.17 | 0.008  | 0.009 | 0.350 |
| rs910912  | 20 | Intergenic    | T | C | 0.26 | 0.017  | 0.003  | 7.82E-09 | 0.26 | -0.004 | 0.007 | 0.590 |
| rs4818005 | 21 | Intron:BRWD1  | G | A | 0.42 | 0.020  | 0.003  | 1.09E-14 | 0.42 | -0.017 | 0.006 | 0.010 |
| rs139896  | 22 | Intron:POLR2F | C | T | 0.65 | 0.015  | 0.003  | 7.14E-09 | 0.65 | 0.017  | 0.007 | 0.012 |
| rs4822102 | 22 | Intergenic    | C | T | 0.38 | 0.017  | 0.003  | 2.78E-10 | 0.39 | -0.006 | 0.007 | 0.360 |
| rs9627272 | 22 | Intergenic    | G | C | 0.59 | 0.0155 | 0.0026 | 2.42E-09 | 0.60 | -0.007 | 0.007 | 0.310 |

Chr indicates chromosome; EA, effect allele; EAF, effect allele frequency; OA, other allele; SE, standard error; SNP, single-nucleotide polymorphism.



**Supplementary Table 3.** Association of smoking initiation with type 2 diabetes using dataset with body mass index adjustment

| <b>Method</b>                    | <b>OR (95% CI)</b> | <b>P</b> |
|----------------------------------|--------------------|----------|
| IVW-random effects               | 1.13 (1.06, 1.21)  | 1.18E-04 |
| Weighted median                  | 1.17 (1.08, 1.25)  | 3.57E-05 |
| MR-Egger                         | 1.05 (0.81, 1.37)  | 0.697    |
| MR-PRESSO (5 outliers corrected) | 1.13 (1.07, 1.20)  | 4.52E-05 |
| I <sup>2</sup> (%)               | 50 (44, 56)        | <0.001   |

CI indicates confidence interval; OR, odds ratio.

Supplementary Figure 1. Scatter plot for the association between smoking initiation and type 2 diabetes

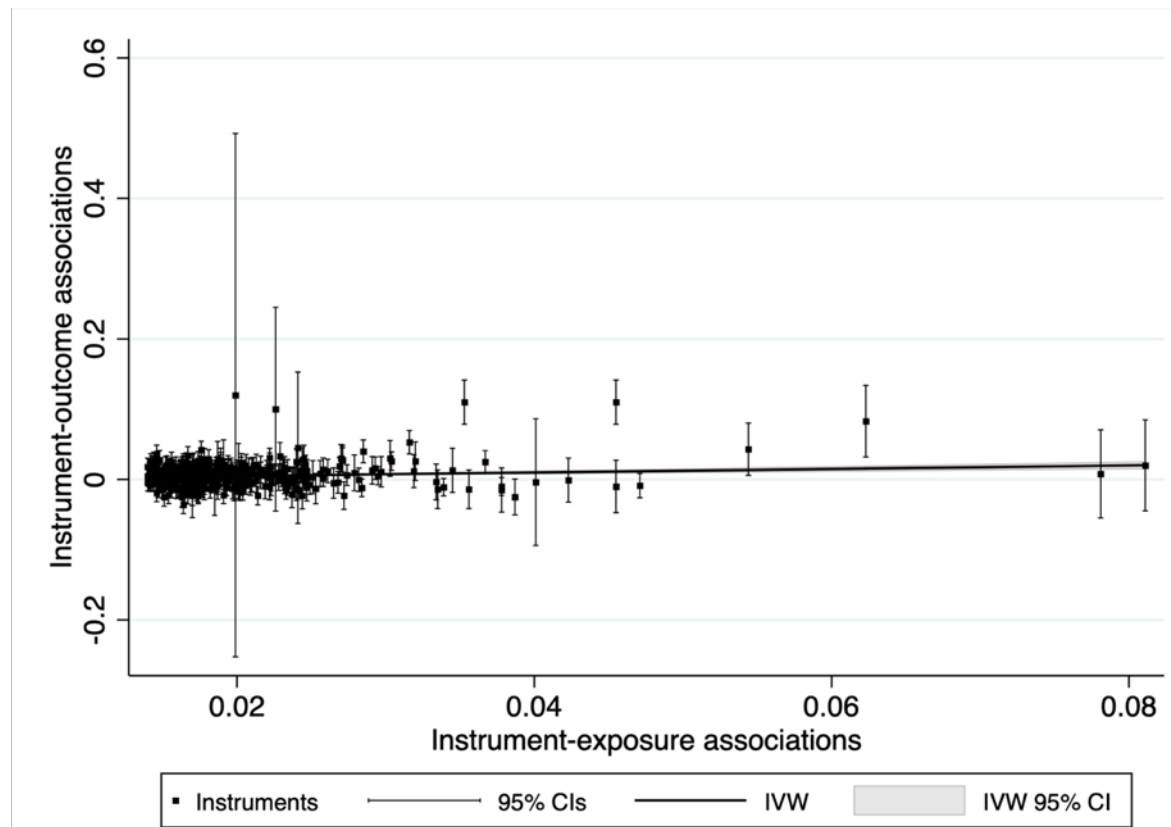

The grey bars indicate 95% confidence intervals. The solid line represents the inverse variance weighted estimate.
